# Supplementary material for: Poly(vinyl alcohol)-assisted synthesis of 3D Bi2S3 submicrometric structures for feasible chip photodetector applications
Source: Royal Society of Chemistry journal article supplement (doi:10.1039/d4tc02565b), 2024-01-01
Supplement: d4tc02565b1.zip [file d4tc02565b1.zip]

**Supplementary Information**

Poly(vinyl alcohol)-assisted synthesis of 3D Bi2S3 submicrometric structures toward feasible chip photodetector applications

Krystian Mistewicz1, Marcin Godzierz2,*, Anna Gawron2, Łukasz Otulakowski2, Anna Hercog2,3, Klaudia Kurtyka2, Sugato Hajra4, Hoe Joon Kim4

1 Silesian University of Technology, Institute of Physics – Center for Science and Education, Krasińskiego 8 Str., 40-019 Katowice, Poland; krystian.mistewicz@polsl.pl

2 Centre of Polymer and Carbon Materials, Polish Academy of Sciences, Curie-Skłodowskiej 34 Str., 41-819 Zabrze, Poland; mgodzierz@cmpw-pan.pl, agawron@cmpw-pan.pl, lotulakowski@cmpw-pan.pl, ahercog@cmpw-pan.pl, kkurtyka@cmpw-pan.pl

3 SPIN-Lab Centre for Microscopic Research on Matter, University of Silesia in Katowice, 75 Pułku Piechoty 1 str., 41-500 Chorzów, Poland; anna.hercog@us.edu.pl

4 Department of Robotics and Mechatronics Engineering, Daegu Gyeongbuk Institute of Science and Technology, Daegu 42988, Republic of Korea; sugatohajra@dgist.ac.kr, joonkim@dgist.ac.kr

* corresponding author: mgodzierz@cmpw-pan.pl





**Fig. S1.** The transient photocurrent responses of Bi2S3 nanosheets (BS-PVAhigh sample) to switching ON and OFF green light illumination (*λ*=517 nm) measured for different light intensities (a) *IL*=915 µW/cm2, (b) *IL*=619 µW/cm2, (c) *IL*=323 µW/cm2, (d) *IL*=183 µW/cm2, (e) *IL*=86 µW/cm2, (f) *IL*=36 µW/cm2, (g) *IL*=5.9 µW/cm2, (h) *IL*=2.3 µW/cm2, (i) *IL*=0.95 µW/cm2 (*U*=1 V, *T*=20°C, *RH*=30%).





**Fig. S2.** The transient photocurrent responses of Bi2S3 nanosheets (BS-PVAhigh sample) to switching ON and OFF red light illumination (*λ*=628 nm) measured for different light intensities (a) *IL*=332 µW/cm2, (b) *IL*=202 µW/cm2, (c) *IL*=92 µW/cm2, (d) *IL*=48 µW/cm2, (e) *IL*=20 µW/cm2, (f) *IL*=7.7 µW/cm2, (g) *IL*=0.98 µW/cm2, (h) *IL*=0.34 µW/cm2, (i) *IL*=0.13 µW/cm2 (*U*=1 V, *T*=20°C, *RH*=30%).
