# Supplementary material for: Poly(vinyl alcohol)-assisted synthesis of 3D Bi2S3 submicrometric structures for feasible chip photodetector applications
Source: Royal Society of Chemistry journal article supplement (doi:10.1039/d4tc02565b), 2024-01-01
Supplement: d4tc02565b2.pdf [file d4tc02565b2.pdf]

## Supplementary Information

Poly(vinyl alcohol)-assisted synthesis of 3D  $\text{Bi}_2\text{S}_3$  submicrometric structures toward feasible chip photodetector applications

Krystian Mistewicz<sup>1</sup>, Marcin Godzierz<sup>2,\*</sup>, Anna Gawron<sup>2</sup>, Łukasz Otulakowski<sup>2</sup>, Anna Hercog<sup>2,3</sup>, Klaudia Kurtyka<sup>2</sup>, Sugato Hajra<sup>4</sup>, Hoe Joon Kim<sup>4</sup>

<sup>1</sup> Silesian University of Technology, Institute of Physics – Center for Science and Education, Krasińskiego 8 Str., 40-019 Katowice, Poland; krystian.mistewicz@polsl.pl

<sup>2</sup> Centre of Polymer and Carbon Materials, Polish Academy of Sciences, Curie-Skłodowskiej 34 Str., 41-819 Zabrze, Poland; mgodzierz@cmpw-pan.pl, agawron@cmpw-pan.pl, lotulakowski@cmpw-pan.pl, ahercog@cmpw-pan.pl, kkurtyka@cmpw-pan.pl

<sup>3</sup> SPIN-Lab Centre for Microscopic Research on Matter, University of Silesia in Katowice, 75 Pułku Piechoty 1 str., 41-500 Chorzów, Poland; anna.hercog@us.edu.pl

<sup>4</sup> Department of Robotics and Mechatronics Engineering, Daegu Gyeongbuk Institute of Science and Technology, Daegu 42988, Republic of Korea; sugatohajra@dgist.ac.kr, joonkim@dgist.ac.kr

\* corresponding author: [mgodzierz@cmpw-pan.pl](mailto:mgodzierz@cmpw-pan.pl)

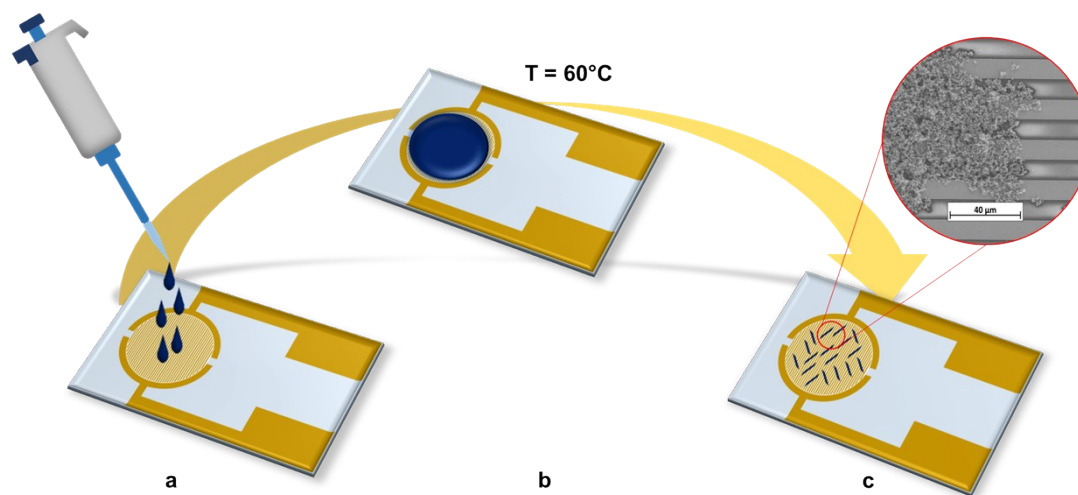

**Fig. S1.** Scheme of photodetector fabrication process: (a) drop-casting of  $\text{Bi}_2\text{S}_3$  dispersion in ethanol onto ED-IDE1-Au chip, (b) solvent evaporation at 60°C, and (c) final chip-based photodetector with deposited particles. An inset in figure (c) shows SEM micrograph of the  $\text{Bi}_2\text{S}_3$  (BS-PVA<sub>high</sub> sample) deposited on the ED-IDE1-Au chip.

**Table S1.** A comparison of the energy band gaps of BS, BS-PVA<sub>low</sub>, and BS-PVA<sub>high</sub> samples with literature data for Bi<sub>2</sub>S<sub>3</sub> (used abbreviations: T – theoretical computations performed using first principle Density Functional Theory (DFT), E – experimental method of energy band gap determination based on UV-VIS spectroscopy).

| Material                                    | Method of material preparation                 | Energy band gap value, eV | Band gap type | Determination method | Ref.      |
|---------------------------------------------|------------------------------------------------|---------------------------|---------------|----------------------|-----------|
| Bi <sub>2</sub> S <sub>3</sub> film         | atomic layer deposition                        | 1.03                      | indirect      | E                    | [1]       |
| Bi <sub>2</sub> S <sub>3</sub>              | not applicable                                 | 1.32                      | indirect      | T                    | [2]       |
| Bi <sub>2</sub> S <sub>3</sub> film         | physical vapor deposition                      | 1.32 – 1.36               |               | E                    | [3]       |
| Bi <sub>2</sub> S <sub>3</sub> film         | reactive evaporation                           | 1.38                      | direct        | E                    | [4]       |
| Bi <sub>2</sub> S <sub>3</sub> nanoflowers  | hydrothermal method                            | 1.39                      | direct        | E                    | [5]       |
| Bi <sub>2</sub> S <sub>3</sub> film         | electrochemical synthesis                      | 1.4                       | direct        | E                    | [6]       |
| Bi <sub>2</sub> S <sub>3</sub> nanosheets   | hydrothermal vulcanization                     | 1.41                      | direct        | E                    | [7]       |
| Bi <sub>2</sub> S <sub>3</sub> nanocrystals | organometallic synthesis                       | 1.443                     |               | E                    | [8]       |
| Bi <sub>2</sub> S <sub>3</sub> nanowires    | hydrothermal vulcanization                     | 1.46                      | direct        | E                    | [7]       |
| Bi <sub>2</sub> S <sub>3</sub> nanoribbons  | hydrothermal vulcanization                     | 1.47                      | direct        | E                    | [7]       |
| Bi <sub>2</sub> S <sub>3</sub>              | not applicable                                 | 1.492                     | indirect      | T                    | [9]       |
| Bi <sub>2</sub> S <sub>3</sub> film         | atomic layer deposition                        | 1.56                      | direct        | E                    | [1]       |
| Bi <sub>2</sub> S <sub>3</sub> film         | chemical bath deposition                       | 1.56                      | direct        | E                    | [10]      |
| Bi <sub>2</sub> S <sub>3</sub> film         | successive ionic layer adsorption and reaction | 1.61                      | direct        | E                    | [11]      |
| Bi <sub>2</sub> S <sub>3</sub> film         | pulse-plating method                           | 1.68                      | direct        | E                    | [12]      |
| BS                                          | microwave synthesis                            | 1.34(2)                   | direct        | E                    | this work |
| BS-PVA <sub>high</sub>                      | PVA-assisted microwave synthesis               | 1.41(1)                   | direct        | E                    | this work |
| BS-PVA <sub>low</sub>                       | PVA-assisted microwave synthesis               | 1.43(3)                   | direct        | E                    | this work |

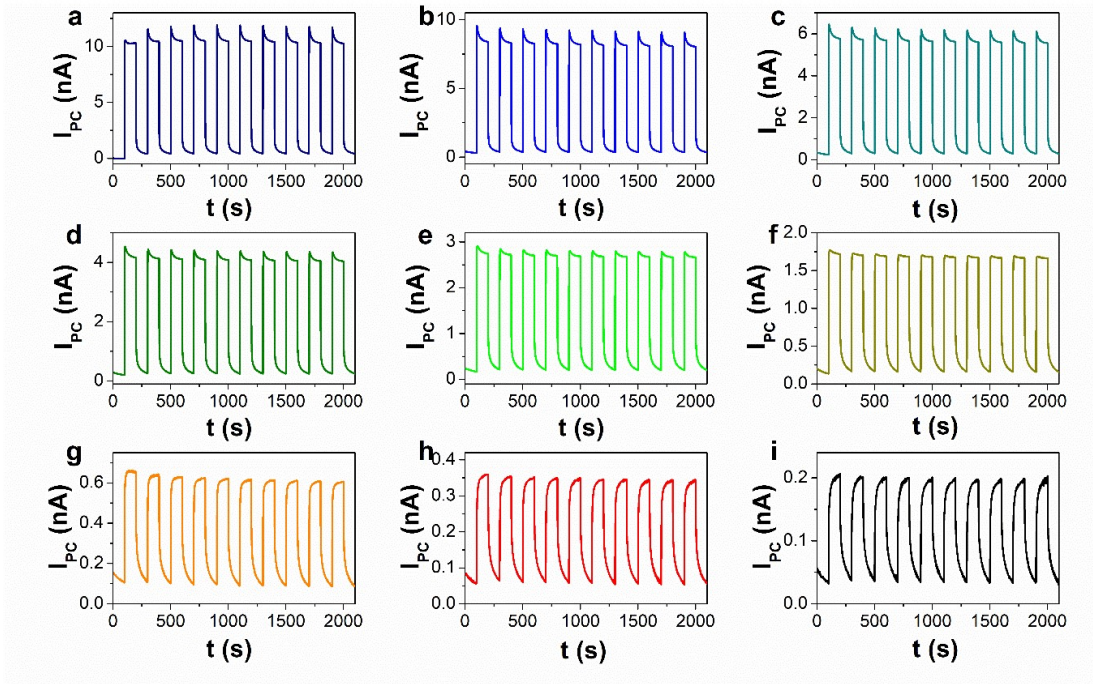

**Fig. S2.** The transient photocurrent responses of  $\text{Bi}_2\text{S}_3$  nanosheets (BS-PVA<sub>high</sub> sample) to switching ON and OFF green light illumination ( $\lambda=517$  nm) measured for different light intensities (a)  $I_L=915 \mu\text{W}/\text{cm}^2$ , (b)  $I_L=619 \mu\text{W}/\text{cm}^2$ , (c)  $I_L=323 \mu\text{W}/\text{cm}^2$ , (d)  $I_L=183 \mu\text{W}/\text{cm}^2$ , (e)  $I_L=86 \mu\text{W}/\text{cm}^2$ , (f)  $I_L=36 \mu\text{W}/\text{cm}^2$ , (g)  $I_L=5.9 \mu\text{W}/\text{cm}^2$ , (h)  $I_L=2.3 \mu\text{W}/\text{cm}^2$ , (i)  $I_L=0.95 \mu\text{W}/\text{cm}^2$  ( $U=1$  V,  $T=20^\circ\text{C}$ ,  $RH=30\%$ ).

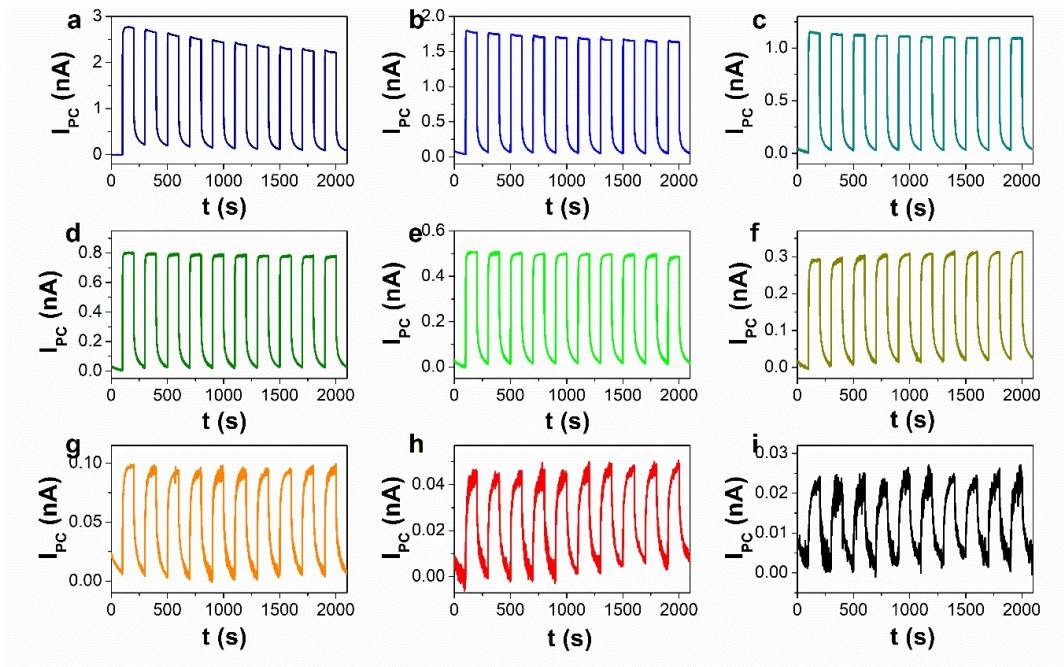

**Fig. S3.** The transient photocurrent responses of  $\text{Bi}_2\text{S}_3$  nanosheets (BS-PVA<sub>high</sub> sample) to switching ON and OFF red light illumination ( $\lambda=628$  nm) measured for different light intensities (a)  $I_L=332 \mu\text{W}/\text{cm}^2$ , (b)  $I_L=202 \mu\text{W}/\text{cm}^2$ , (c)  $I_L=92 \mu\text{W}/\text{cm}^2$ , (d)  $I_L=48 \mu\text{W}/\text{cm}^2$ , (e)  $I_L=20 \mu\text{W}/\text{cm}^2$ , (f)  $I_L=7.7 \mu\text{W}/\text{cm}^2$ , (g)  $I_L=0.98 \mu\text{W}/\text{cm}^2$ , (h)  $I_L=0.34 \mu\text{W}/\text{cm}^2$ , (i)  $I_L=0.13 \mu\text{W}/\text{cm}^2$  ( $U=1$  V,  $T=20^\circ\text{C}$ ,  $RH=30\%$ ).

## References

1. Mahuli N, Saha D, Sarkar SK. Atomic Layer Deposition of p-Type Bi<sub>2</sub>S<sub>3</sub>. *J Phys Chem C* [Internet]. 2017(e)ko apirilakaren 13a;121(14):8136–44. Available at: <https://doi.org/10.1021/acs.jpcc.6b12629>
2. Koc H, Ozisik H, Deligöz E, Mamedov AM, Ozbay E. Mechanical, electronic, and optical properties of Bi<sub>2</sub>S<sub>3</sub> and Bi<sub>2</sub>Se<sub>3</sub> compounds: first principle investigations. *J Mol Model* [Internet]. 2014(e)ko ;20(4):2180. Available at: <https://doi.org/10.1007/s00894-014-2180-1>
3. ten Haaf S, Sträter H, Brüggemann R, Bauer GH, Felser C, Jakob G. Physical vapor deposition of Bi<sub>2</sub>S<sub>3</sub> as absorber material in thin film photovoltaics. *Thin Solid Films* [Internet]. 2013(e)ko ;535:394–7. Available at: <https://www.sciencedirect.com/science/article/pii/S0040609012015866>
4. Lukose J, Pradeep B. Electrical and optical properties of bismuth sulphide [Bi<sub>2</sub>S<sub>3</sub>] thin films prepared by reactive evaporation. *Solid State Commun* [Internet]. 1991(e)ko ;78(6):535–8. Available at: <https://www.sciencedirect.com/science/article/pii/0038109891903712>
5. Sharma S, Khare N. Sensitization of narrow band gap Bi<sub>2</sub>S<sub>3</sub> hierarchical nanostructures with polyaniline for its enhanced visible-light photocatalytic performance. *Colloid Polym Sci* [Internet]. 2018(e)ko ;296(9):1479–89. Available at: <https://doi.org/10.1007/s00396-018-4362-3>
6. Grubač Z, Katić J, Metikoš-Huković M. Energy-Band Structure as Basis for Semiconductor n-Bi<sub>2</sub>S<sub>3</sub>/n-Bi<sub>2</sub>O<sub>3</sub> Photocatalyst Design. *J Electrochem Soc* [Internet]. 2019(e)ko ;166(10):H433. Available at: <https://dx.doi.org/10.1149/2.0481910jes>
7. Liang YC, Li TH. Controllable morphology of Bi<sub>2</sub>S<sub>3</sub> nanostructures formed via hydrothermal vulcanization of Bi<sub>2</sub>O<sub>3</sub> thin-film layer and their photoelectrocatalytic performances. 2022(e)ko ;11(1):284–97. Available at: <https://doi.org/10.1515/ntrev-2022-0016>
8. Aresti M, Saba M, Piras R, Marongiu D, Mula G, Quochi F, et al. Colloidal Bi<sub>2</sub>S<sub>3</sub> Nanocrystals: Quantum Size Effects and Midgap States. *Adv Funct Mater* [Internet]. 2014(e)ko ekainakaren 1a;24(22):3341–50. Available at: <https://doi.org/10.1002/adfm.201303879>
9. Ben Abdallah H, Ouerghui W. Spin–orbit coupling effect on electronic, linear and nonlinear optical properties of Bi<sub>2</sub>S<sub>3</sub> and the ternary bismuth sulfide Bi<sub>2</sub>S<sub>2.75</sub>Se<sub>0.25</sub>: Ab-initio calculations. *Opt Quantum Electron* [Internet]. 2021(e)ko ;54(1):20. Available at: <https://doi.org/10.1007/s11082-021-03411-y>
10. Moreno-García H, Messina S, Calixto-Rodríguez M, Martínez H. Physical properties of chemically deposited Bi<sub>2</sub>S<sub>3</sub> thin films using two post-deposition treatments. *Appl Surf Sci* [Internet]. 2014(e)ko ;311:729–33. Available at: <https://www.sciencedirect.com/science/article/pii/S0169433214011878>
11. Suresh Kumar M, Madhusudanan SP, Mohanta K, Batabyal SK. Development and characterization of photodiode from p-Cu<sub>2</sub>CdSnS<sub>4</sub>/n-Bi<sub>2</sub>S<sub>3</sub> heterojunction. *Mater Res Express* [Internet]. 2020(e)ko ;7(1):15909. Available at: <https://dx.doi.org/10.1088/2053-1591/ab65e1>
12. Ding F, Wang Q, Zhou S, Zhao G, Ye Y, Ghomashchi R. Synthesis of Bi<sub>2</sub>S<sub>3</sub> thin films based on pulse-plating bismuth nanocrystallines and its photoelectrochemical properties. *R Soc Open Sci* [Internet]. 2020(e)ko abuztuakaren 12a;7(8):200479. Available at: <https://doi.org/10.1098/rsos.200479>
